# Supplementary material
Source: Springer Nature journal article supplement (https://www.springermedizin.de/resource/supplementary/12889_2011_3365_MOESM1_ESM.pdf/9488690)
Supplement: MOESM1 [file 9488690]

Early Childhood Caries (tooth decay)  
Periodontal (gum) diseases

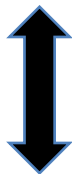

Poor oral health

Risk factors:

- consumption of sweet drinks
- consumption of sweet foods
- frequent snacking behaviours
- low intake of fluoridated water

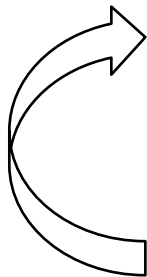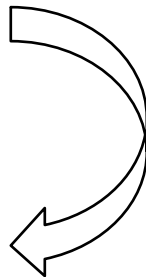

Risk factors:

- sore teeth and gums
- loose or missing teeth

Poor nutrition

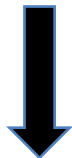

Childhood Obesity
